# Supplementary material for: Poly(Beta-Amino Ester) Nanoparticles Enable Nonviral Delivery of CRISPR-Cas9 Plasmids for Gene Knockout and Gene Deletion
Source: PubMed Central journal article supplement — Mol Ther Nucleic Acids. 2020 Apr 21;20:661–72. doi: 10.1016/j.omtn.2020.04.005 (PMC7210380; doi:10.1016/j.omtn.2020.04.005), 2020-04-21
Supplement: mmc1.pdf [file mmc1.pdf]

OMTN, Volume 20

## **Supplemental Information**

### **Poly(Beta-Amino Ester) Nanoparticles Enable Nonviral Delivery of CRISPR-Cas9 Plasmids for Gene Knockout and Gene Deletion**

**Yuan Rui, Mahita Varanasi, Shanelle Mendes, Hannah M. Yamagata, David R. Wilson, and Jordan J. Green**

## Supplemental Information

### Supplemental Data:

- Figure S1. GFP transfection screen results for B16-F10 cells.
- Figure S2. TIDE quantification of indel frequencies.
- Figure S3. Expression timeline for 2-cut edits.
- Figure S4. Microscopy images of ReNL gain of expression.
- Figure S5. Expression kinetics of CRISPR components in B16 cells.
- Figure S6. Long-term Cas9 accumulation in 293T cells.
- Figure S7. Comparison to commercial transfection reagents.
- Figure S8. Nanoparticle uptake in B16 and 293T cells.

Table S1. PCR primer sequences

Table S2. Addgene plasmid numbers

Table S3. Primer and template sequences for tRNA-gRNA plasmid.

Calculation S1. N-P ratios of PBAE/DNA nanoparticles

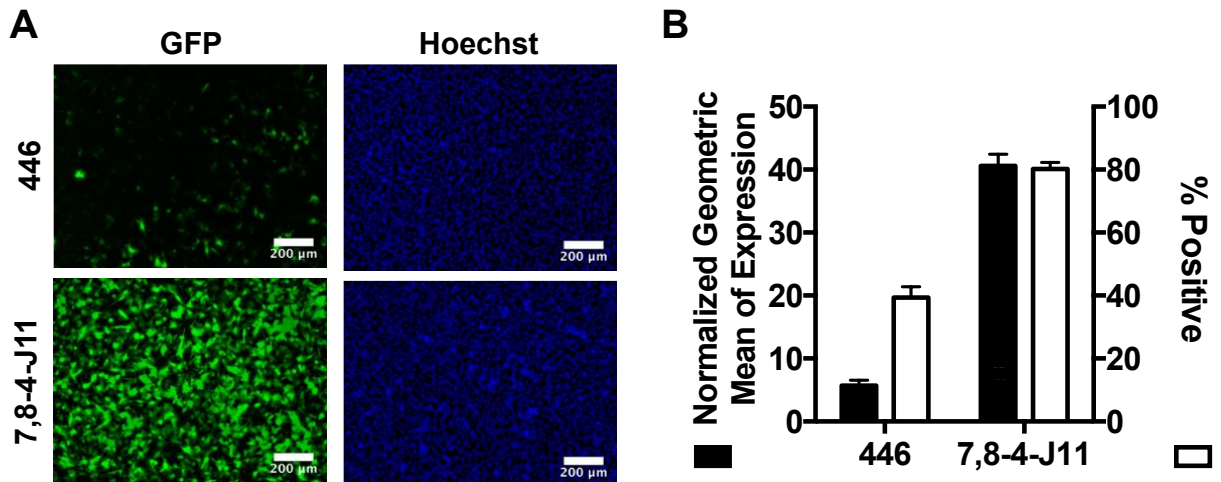

**Figure S1. GFP transfection screen results for B16-F10 cells.** Fluorescence microscopy images (A) and flow cytometry results (B) show that branched PBAE polymer 7,8-4-J11 (30 w/w) transfects B16 cells more efficiently than canonical linear PBAE polymer 446 (60 w/w). Data presented as mean + SEM;  $N = 4$ . Scale bar = 200  $\mu$ m.

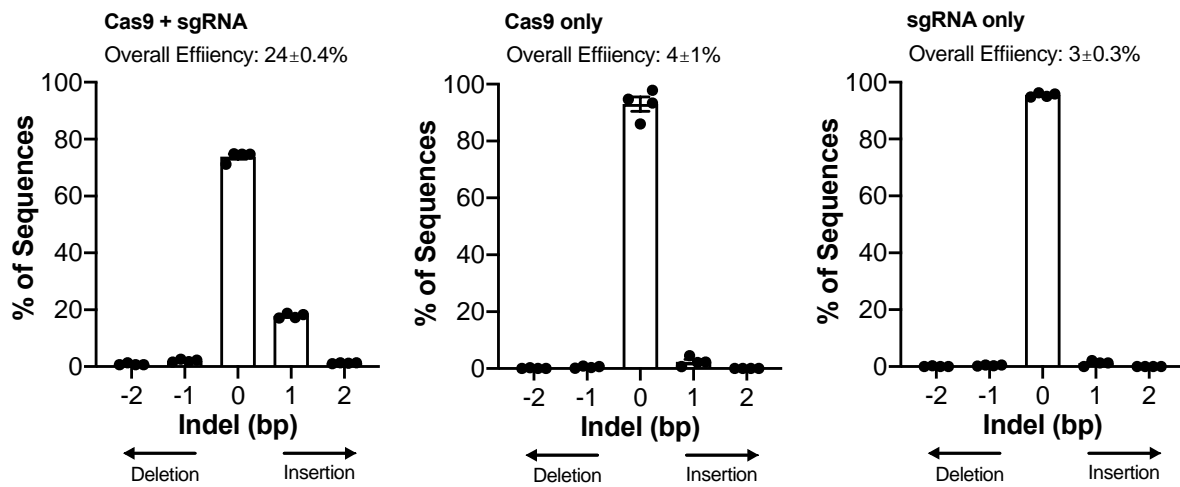

**Figure S2. TIDE quantification of indel frequencies.** Sanger sequencing data of the genomic DNA of HEK-GFP cells treated with nanoparticles delivering CRISPR plasmids were quantified by TIDE analysis.  $N = 3$ , data presented as mean  $\pm$  SEM.

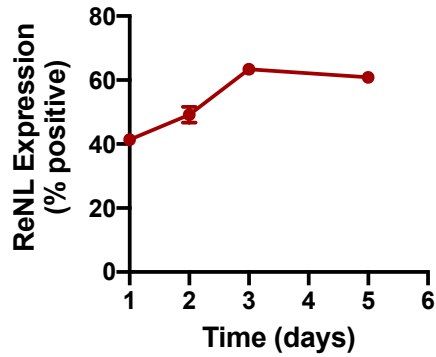

**Figure S3. ReNL expression time course after 2-cut edits in HEK cells.** HEK cells were transfected on day 0 and gain of ReNL expression was monitored on selected days to determine the expression timeline for ReNL.  $N = 4$ , data presented as mean  $\pm$  SEM.

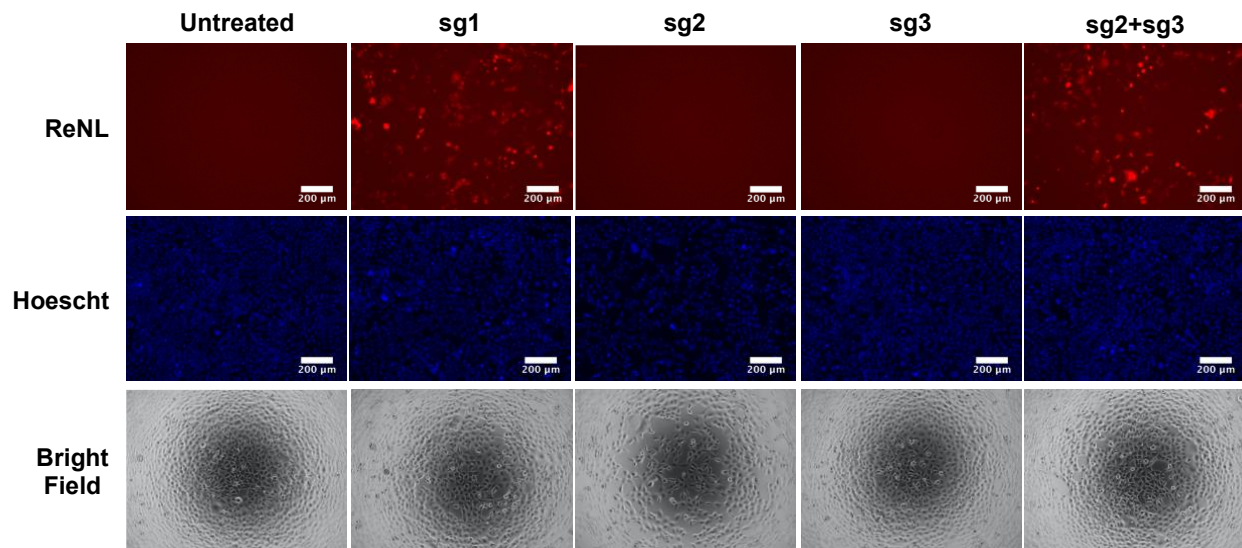

**Figure S4. Microscopy images of ReNL gain of expression.** 2-cut CRISPR cleavage with sg1 or combination of sg2+sg3 turn on expression of ReNL by removal of two SV40 polyA sequences. Scale bar = 200  $\mu\text{m}$ .

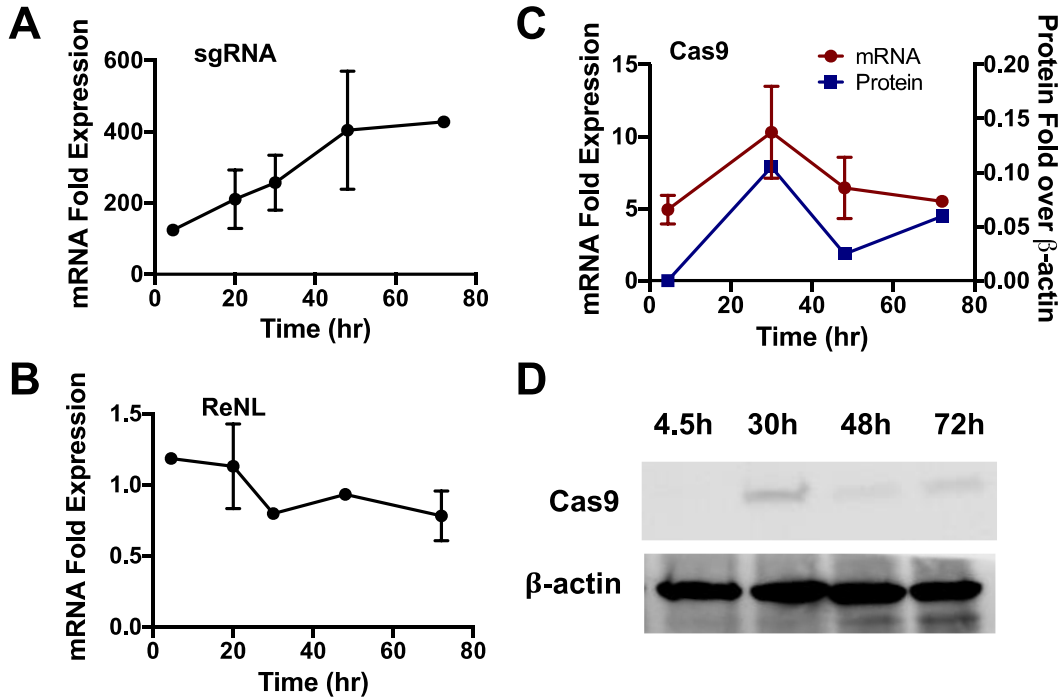

**Figure S5. Expression kinetics of CRISPR components in B16 cells.** mRNA expression levels of sgRNA (A) and ReNL (B). Cas9 mRNA (C, red curve) and protein (C, blue curve; D) expression levels over time. N = 2 (data shown as mean  $\pm$  SEM) for qRT-PCR experiments; N=1 for western blots.

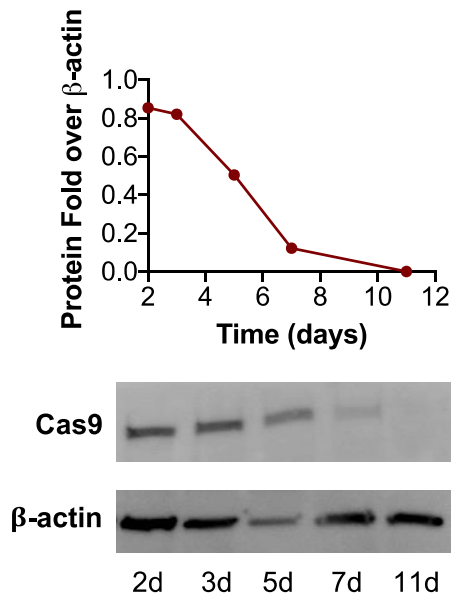

**Figure S6. Long-term Cas9 accumulation in 293T cells.** Western blotting was performed on indicated days after transfection of Cas9 and sgRNA plasmids in HEK-293T cells and Cas9 protein expression levels were quantified as fold expression over  $\beta$ -actin based on image analysis of band intensities (n=1).

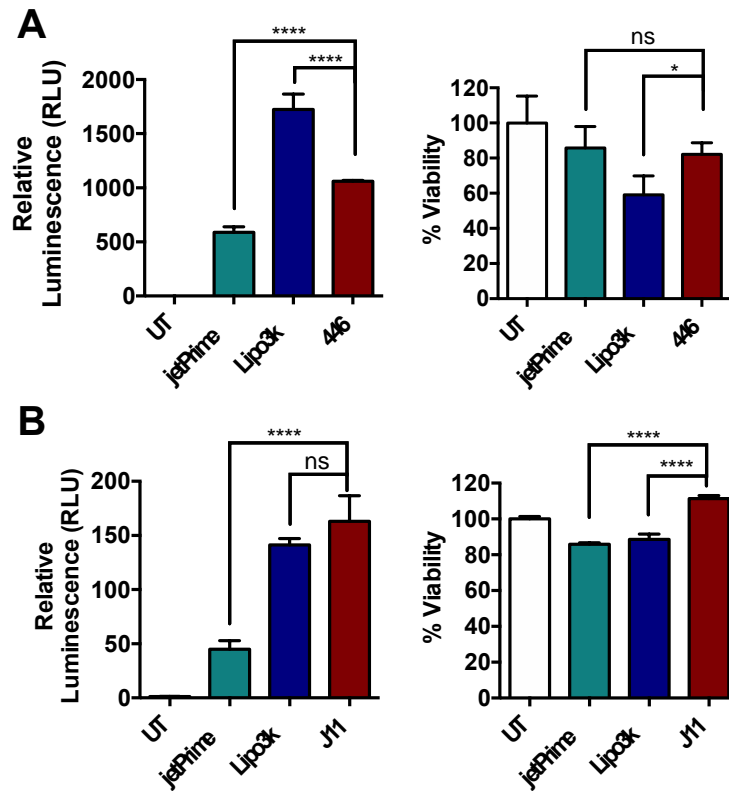

**Figure S7. Comparison to commercial transfection reagents.** Gain of expression from 2-cut edits and viability of cells using commercial reagents and PBAEs in **(A)** 293T and **(B)** B16 cells as measured by ReNL luminescence. Data presented as mean + SEM; N=4. Statistical significance assessed by one-way ANOVA with Dunnett post-hoc tests as compared to the PBAE treated group (446 or J11, respectively); \*p < 0.05, \*\*\*\*p < 0.0001

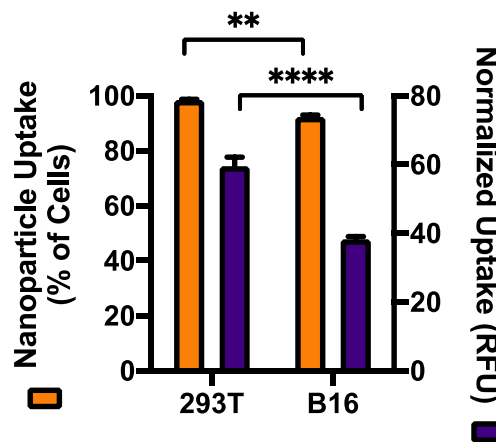

**Figure S8. Nanoparticle uptake analysis in B16 and 293T cells.** Flow cytometry analysis of cellular uptake of nanoparticles encapsulating 20% Cy5-labeled DNA. Data shown as mean + SEM; N=4. Statistical significance assessed by one-way ANOVA with Sidak's post-hoc tests; \*\*p < 0.01, \*\*\*\*p < 0.0001.

| Target                 | Sequence                                                    | Notes                                             |
|------------------------|-------------------------------------------------------------|---------------------------------------------------|
| GFP                    | FWD: CTGGTCGAGCTGGACGGCGACG<br>REV: CACGAACTCCAGCAGGACCATG  | Amplicon size: 630 bp                             |
| 2X-SV40 Stop Cassette  | FWD: CGCAAATGGGCGGTAGGCGTG<br>REV: GCCCTTGCTCACCATGAATT     | Amplicon size: 755 bp                             |
| hCas9                  | FWD: GGAGTTGACGCCAAAGCAATCC<br>REV: AGATTTAAAGTTGGGGGTCAGCC | Amplicon size: 150 bp                             |
| ReNL                   | FWD: ATCCCGTATGAAGGTCTGAGCG<br>REV: GTCGATCATGTTTCGGCGTAACC | Amplicon size: 147 bp                             |
| sgRNA1                 | FWD: ACATTATACGGTTTCAGAGC<br>REV: GACTCGGTGCCACTTTTCA       | Amplicon size: 91 bp                              |
| $\beta$ -actin (human) | FWD: CATGTACGTTGCTATCCAGGC<br>REV: CTCCTTAATGTCACGCACGAT    | Amplicon size: 250 bp<br>Primerbank ID: 4501885a1 |
| $\beta$ -actin (mouse) | FWD: CTGTCCCTGTATGCCTCTG<br>REV: ATGTCACGCACGATTTC          | Amplicon size: 218 bp                             |

**Table S1. PCR primer sequences.**

| <b>Plasmid Name</b> | <b>Addgene ID</b> | <b>Description</b>                                                                                                                                                                                |
|---------------------|-------------------|---------------------------------------------------------------------------------------------------------------------------------------------------------------------------------------------------|
| PB-iRFP-STOP-ReNL   | 113965            | Piggybac transposon plasmid CRISPR gene deletion activatable fluorescence. Constitutive iRFP670 under EF1A promoter, CMV promoter with two SV40 polyA followed by red-enhanced nanolantern (ReNL) |
| sg1                 | 113966            | Single short guide RNA targeting GTATAGCATACATTATACG                                                                                                                                              |
| sg2                 | 133967            | Single short guide RNA targeting TACCACATTTGTAGAGGTT                                                                                                                                              |
| sg3                 | 133968            | Single short guide RNA targeting CAATGTATCTTATCATGTC                                                                                                                                              |
| sg1+sg2+sg3         | 133969            | Triple short guide RNA targeting GTATAGCATACATTATACG, TACCACATTTGTAGAGGTT & CAATGTATCTTATCATGTC                                                                                                   |
| sg2+sg3             | 133970            | Double short guide RNA targeting TACCACATTTGTAGAGGTT & CAATGTATCTTATCATGTC                                                                                                                        |
| sgiRFP1             | 133972            | Single short guide RNA targeting GATCGAGTTCGAGCCTGCGG in iRFP670 sequence                                                                                                                         |
| sgiRFP2             | 133973            | Single short guide RNA targeting GCGCGTTCTTTGGACGCGA in iRFP670 sequence                                                                                                                          |
| sgiRFP3             | 133974            | Single short guide RNA targeting CGTGATGTTGTACCGCTTC in iRFP670 sequence                                                                                                                          |

**Table S2. Plasmids deposited with Addgene**



| DNA Sequence                                                                                                                                                                                                     | Description and notes                                                                                         |
|------------------------------------------------------------------------------------------------------------------------------------------------------------------------------------------------------------------|---------------------------------------------------------------------------------------------------------------|
| ATTATTGACTAGTAGTGTTTATAGAGCTAGAAATAG<br>CAAGTTAAAATAAGGCTAGTCCGTTATCAACTTGAA<br>AAAGTGGCACCGAGTCGGTGCAACAAAGCACCAGT<br>GGTCTAGTGGTAGAATAGTACCCTGCCACGGTACAG<br>ACCCGGGTTTCGATTCCCGGCTGGTGCA GCCAAGCTT<br>GGCGTAA | pGTR sequence<br>SpeI restriction enzyme site<br>HindIII restriction enzyme site<br>gRNA scaffold<br>pre-tRNA |
| AGTTAGTTtctagaACAAAGCACCAGTGG                                                                                                                                                                                    | tRNA-start_F primer<br>XbaI restriction enzyme site                                                           |
| GAACCTCTACAAATGTGGTA                                                                                                                                                                                             | sg2 protospacer sequence;<br>overlapping base pairs used in Golden Gate primers                               |
| TAGGTCTCCACAAATGTGGTAGTTTTAGAGCTAGAA                                                                                                                                                                             | sg2_F primer                                                                                                  |
| ATGGTCTCATTTGTAGAGGTTCTGCACCAGCCGGGAA                                                                                                                                                                            | sg2_R primer                                                                                                  |
| GCAATGTATCTTATCATGTC                                                                                                                                                                                             | sg3 protospacer sequence;<br>overlapping base pairs used in Golden Gate primers                               |
| TAGGTCTCCTCTTATCATGTCGTTTTAGAGCTAGAA                                                                                                                                                                             | sg3_F primer                                                                                                  |
| ATGGTCTCAAAGATACATTGCTGCACCAGCCGGGAA                                                                                                                                                                             | sg3_R primer                                                                                                  |
| CAATGTATaagcttAAAAAAAAAAGCACCGACTCG                                                                                                                                                                              | gRNA-end_R primer<br>HindIII restriction enzyme site                                                          |

**Table S3. DNA and primer sequences used to generate multiplex tRNA-gRNA plasmid.** The pGTR sequence was cloned into a backbone plasmid via restriction enzyme cloning using SpeI and HindIII. The pGTR plasmid was then used as the PCR template for amplifying gRNA-tRNA sequences for Golden Gate assembly. To synthesize a multiplex plasmid containing both sg2 and sg3, PCR amplicons were generated using the following pairs of primers: tRNA-start\_F + sg2\_R (amplicon 1); sg2\_F + sg3\_R (amplicon 2); sg3\_F + gRNA-end\_R (amplicon 3). Amplicons 1-3 were then purified, ligated by Golden Gate assembly, and cloned into a backbone vector containing a single U6 promoter using restriction enzyme cloning with XbaI and HindIII.

**Calculation S1. N-P ratios of PBAE/DNA nanoparticles.** Gel permeation chromatography was used to measure the molecular weight of polymers 446 and 7,8-4-J11, respectively. The number averaged molecular weight ( $M_N$ ) was 5935 Da for 446 and 6943 Da for 7,8-4-J11. Using polymer  $M_N$  and the molecular weight of individual monomers, the nitrogen (N) weight fraction was calculated to be 0.055 for 446 and 0.046 for 7,8-4-J11. The average phosphate (P) weight fraction for DNA was calculated to be 0.095. Taken together, 446 nanoparticles at 60 w/w had an N-P ratio of 34.5, and 7,8-4-J11 nanoparticles at 30 w/w had an N-P ratio of 14.5.
